# Supplementary material for: A systematic review of the sensitivity and specificity of lateral flow devices in the detection of SARS-CoV-2
Source: BMC Infect Dis. 2021 Aug 18;21:828. doi: 10.1186/s12879-021-06528-3 (PMC8371300; doi:10.1186/s12879-021-06528-3)
Supplement: Supplementary file 1 — Additional file 1. Appendix 1 - Gender split for each paper included in the study. Appendix 2 - Sample size based on manufacturer of LFD used. [file 12879_2021_6528_MOESM1_ESM.pdf]

### Supplementary Materials

#### Appendix 1:

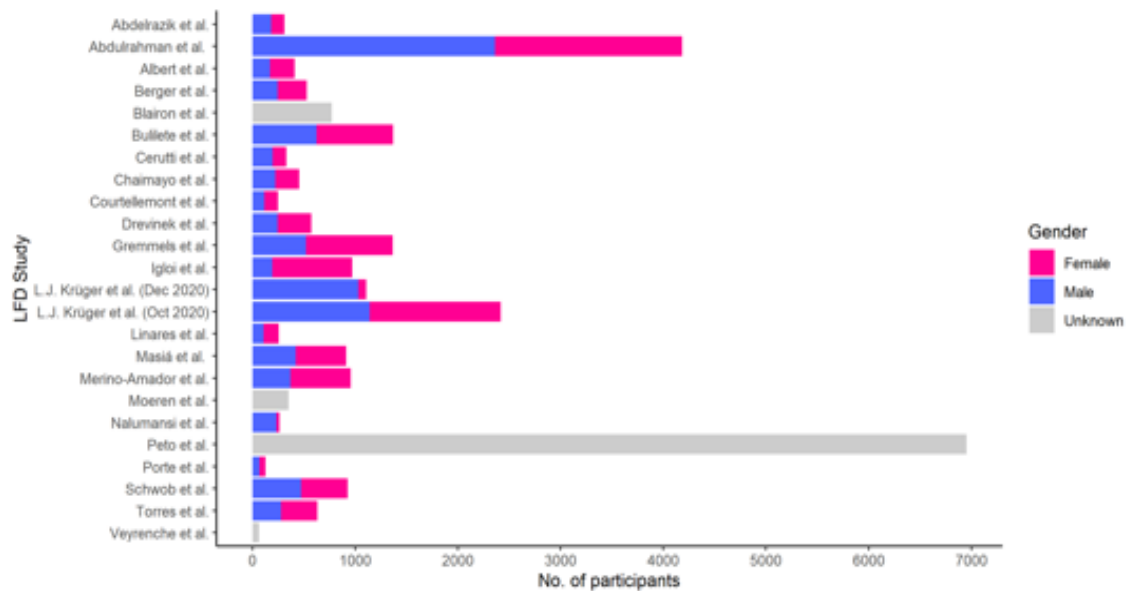

Gender split for each paper included in the study:

#### Appendix 2:

Sample size based on manufacturer of LFD used

| Manufacturer of LFD | Sample size |
|---------------------|-------------|
| Panbio Abbott       | 13221       |
| Innova              | 6954        |
| Standard Q          | 4402        |
| CORIS               | 1199        |
| Bioeasy             | 856         |
| COVID-VIRO®         | 572         |
| BD Veritor          | 352         |

|           |     |
|-----------|-----|
| BIOCREDIT | 310 |
|-----------|-----|

10

11
